# Supplementary material for: Exogenous Autoinducer-2 Rescues Intestinal Dysbiosis and Intestinal Inflammation in a Neonatal Mouse Necrotizing Enterocolitis Model
Source: PubMed Central journal article supplement (PMC8375469; doi:10.3389/fcimb.2021.694395), 2021-08-05
Supplement: Image_1.pdf [file Image_1.pdf]

## Supplementary Material

### 1.1 Supplementary Figures

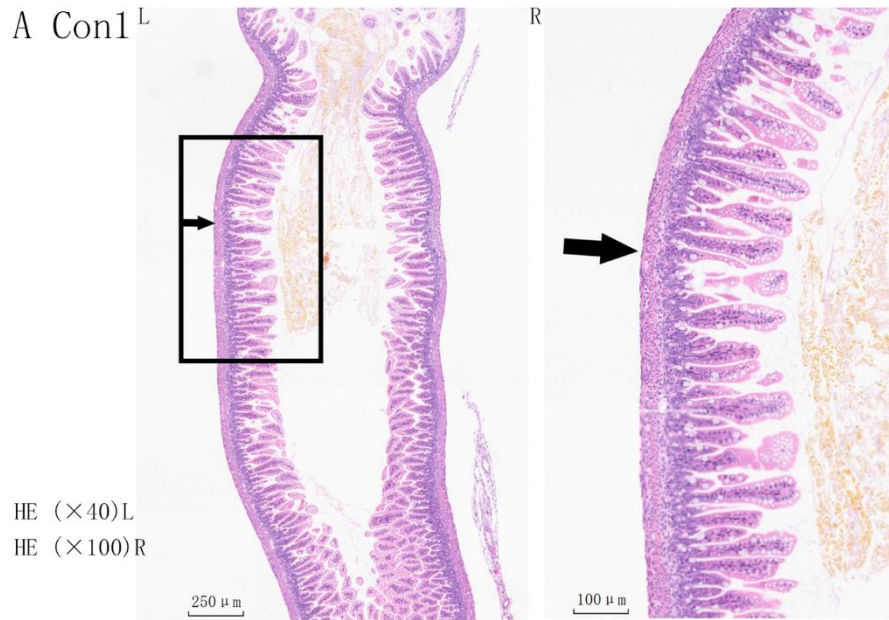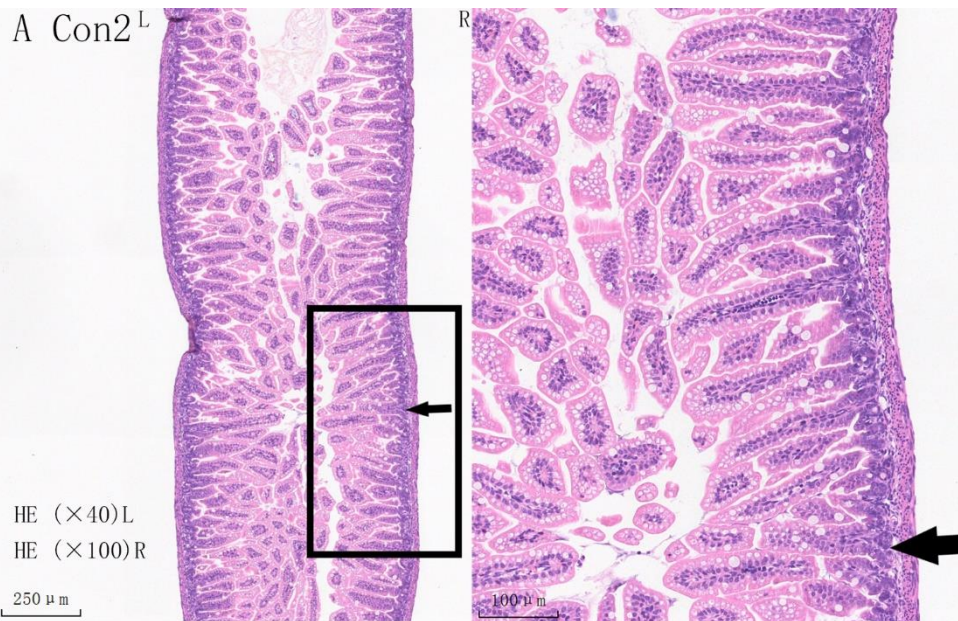

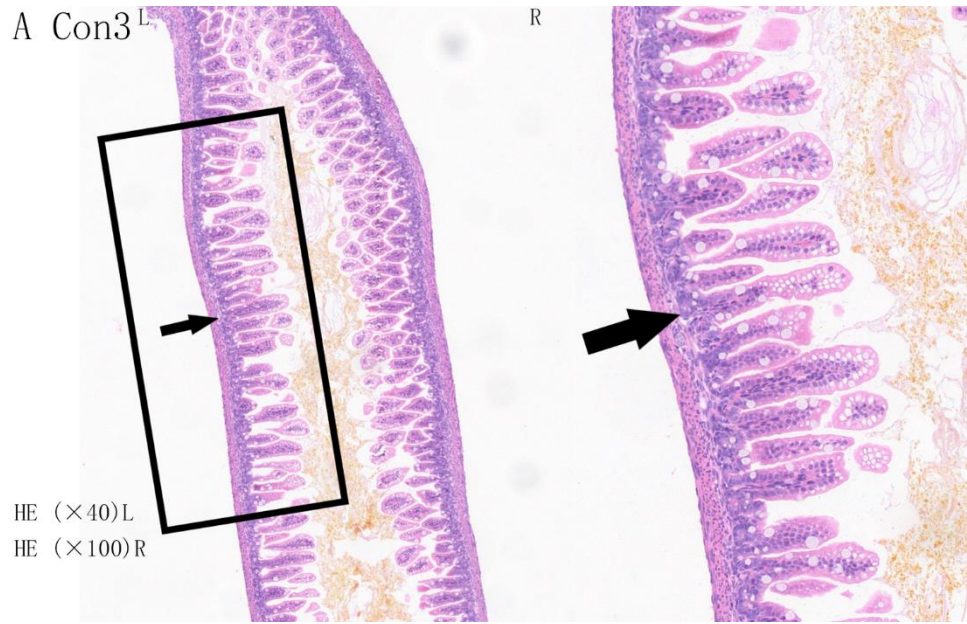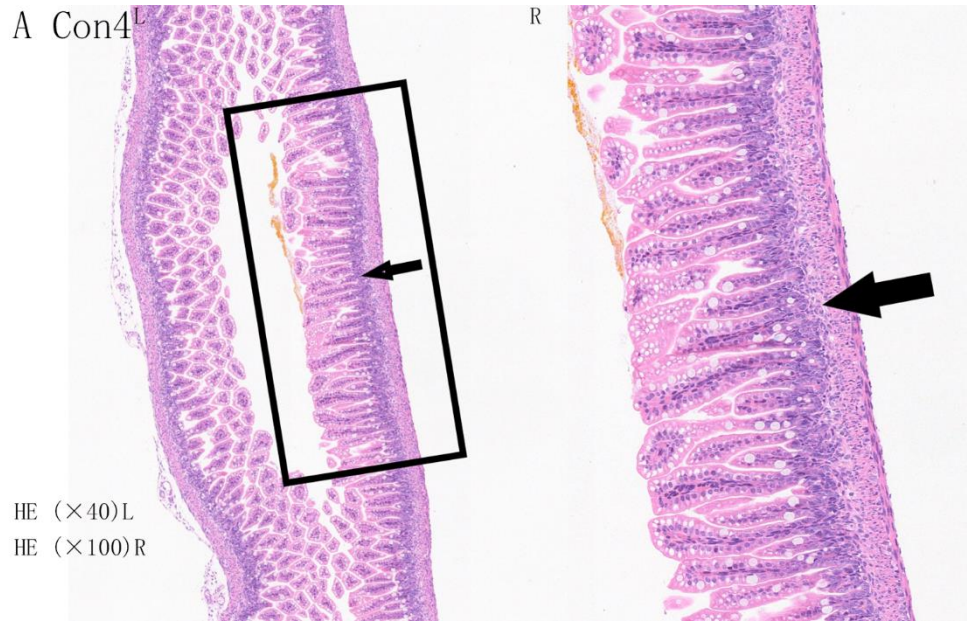

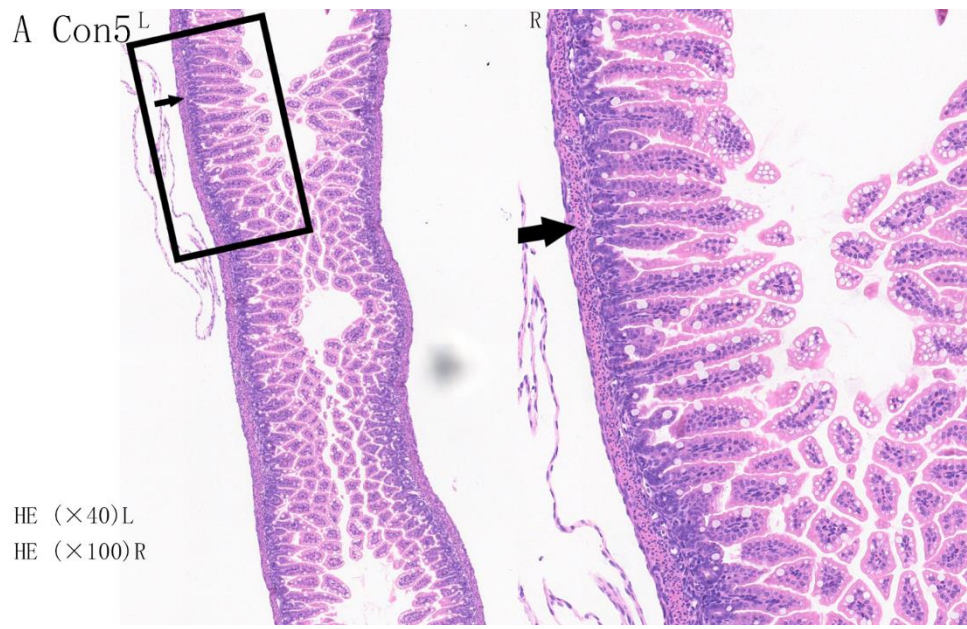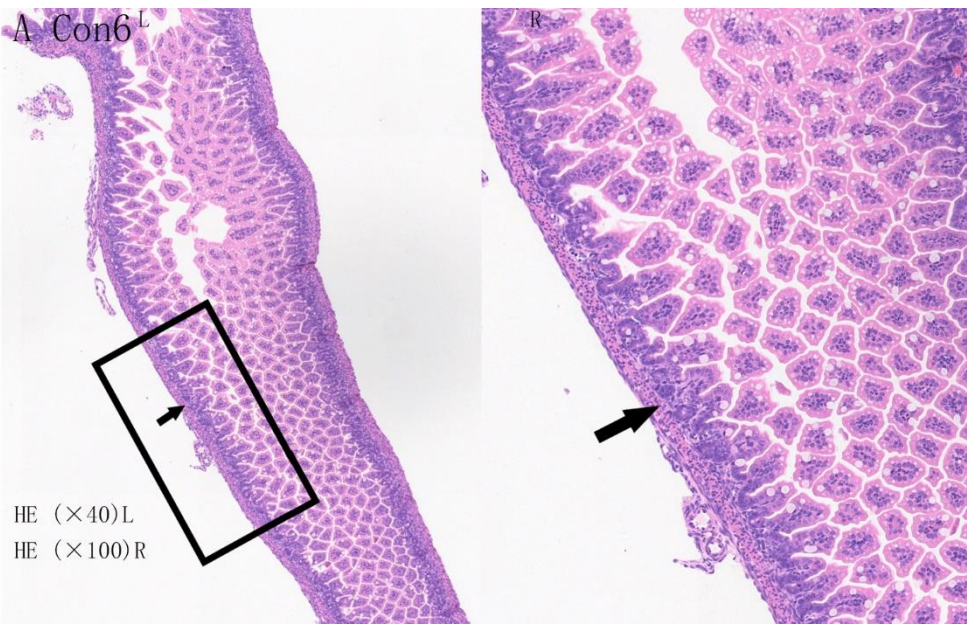

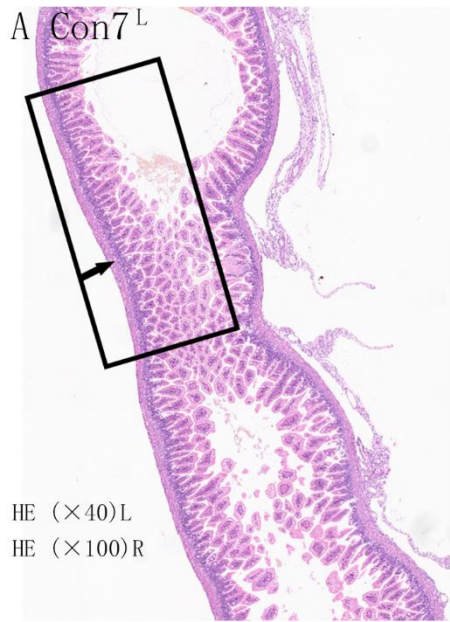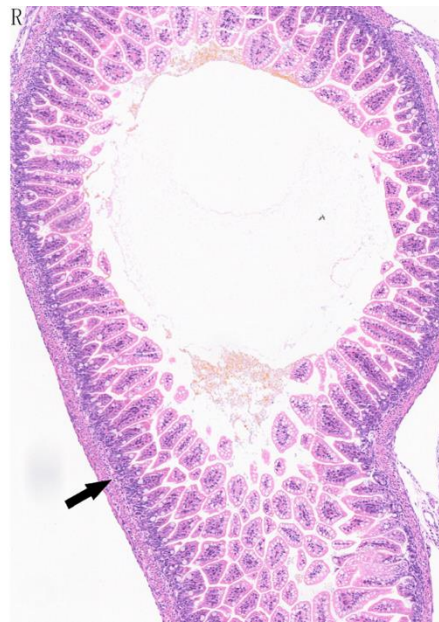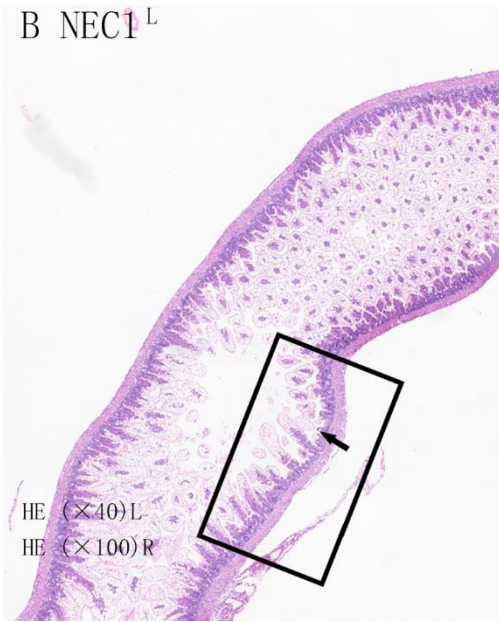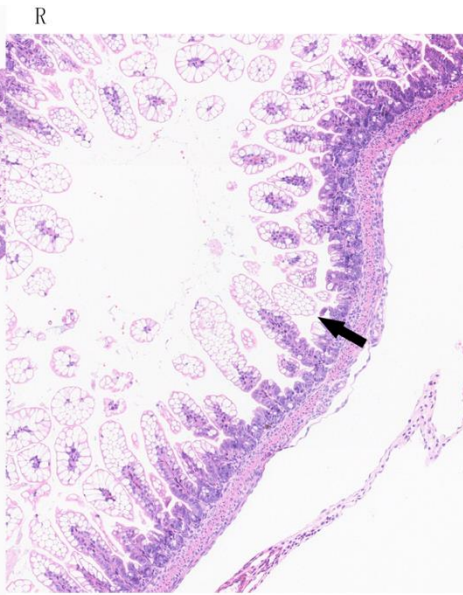

B NEC2<sup>L</sup>

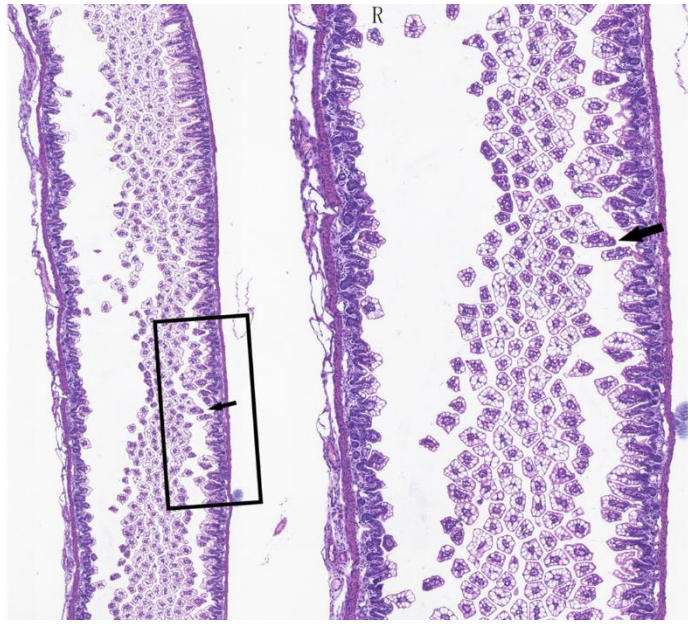

HE (×40)L  
HE (×100)R

B NEC3<sup>L</sup>

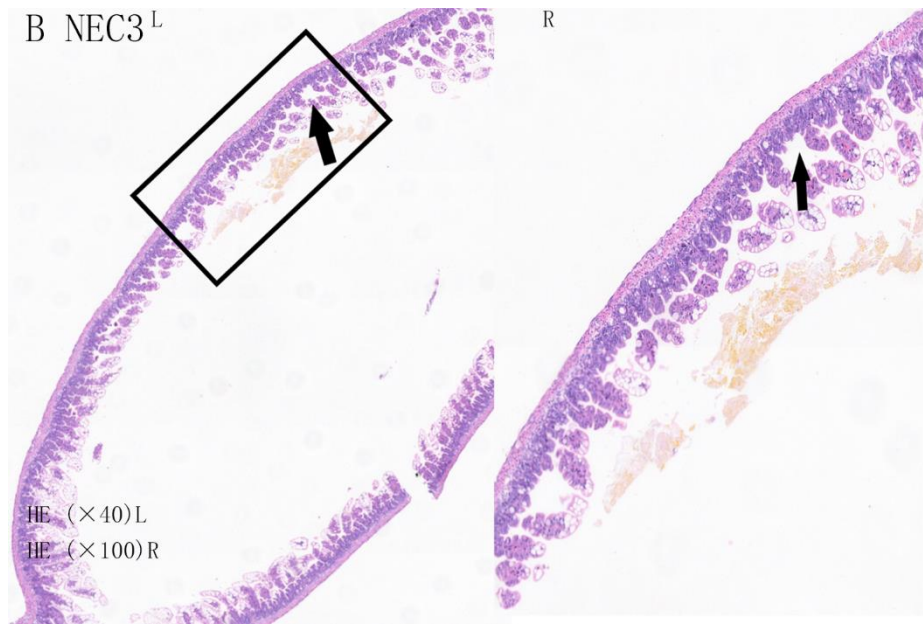

HE (×40)L  
HE (×100)R

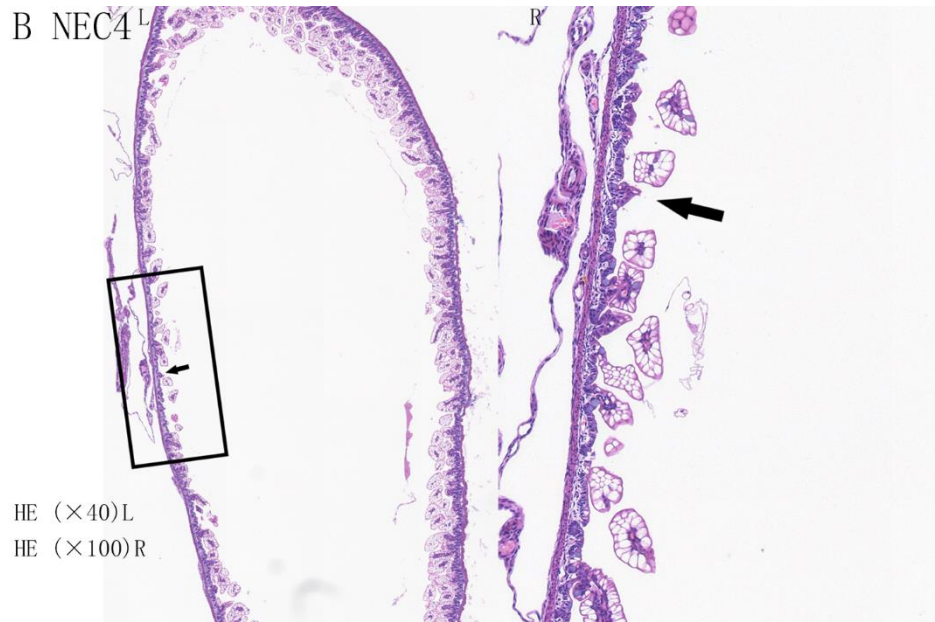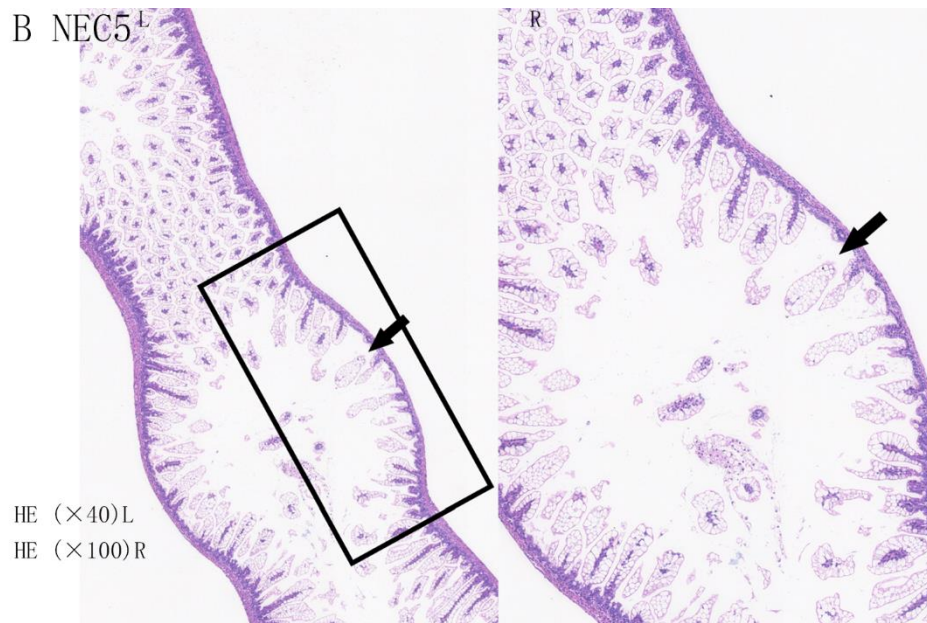

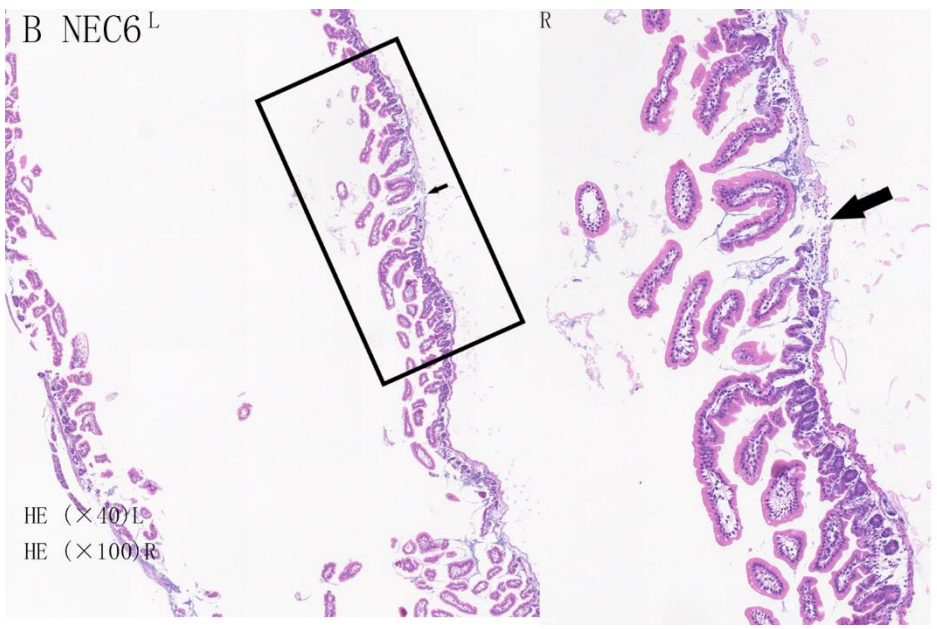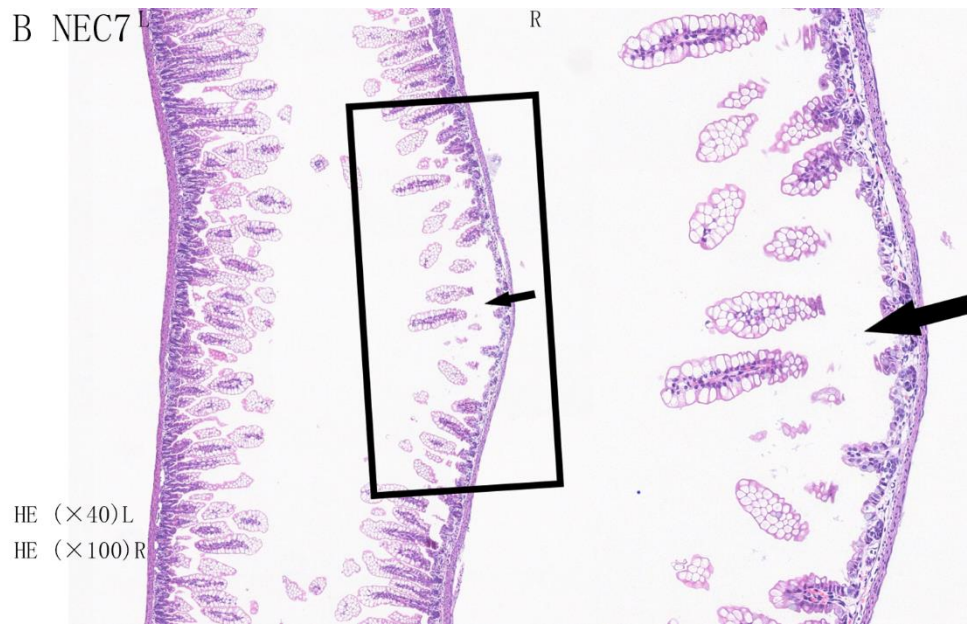

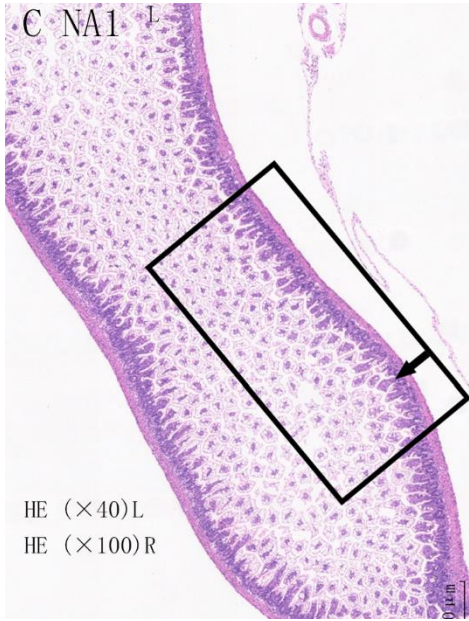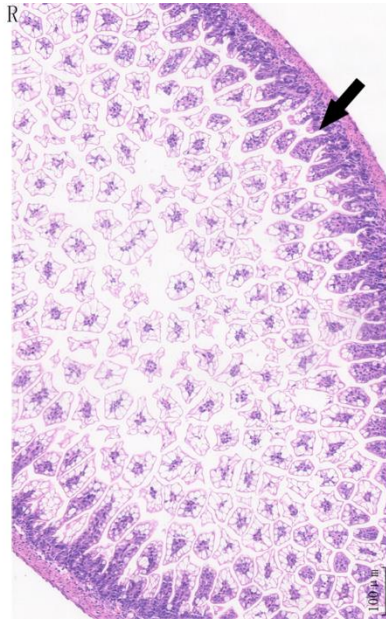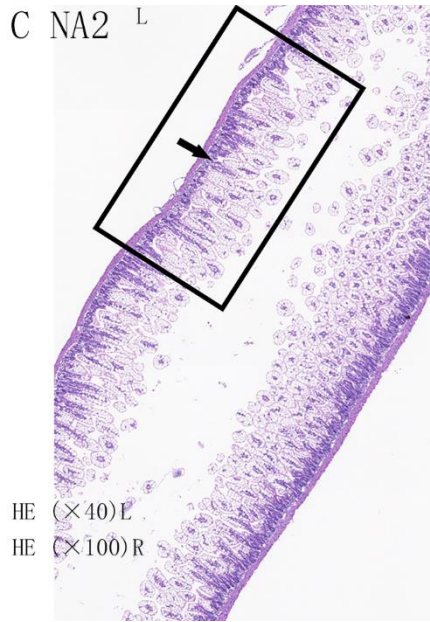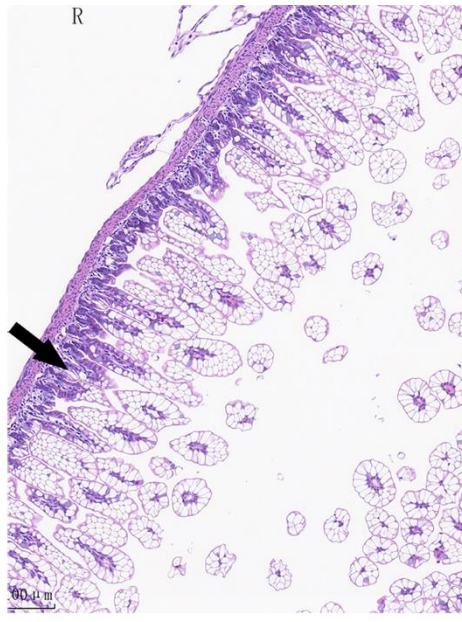



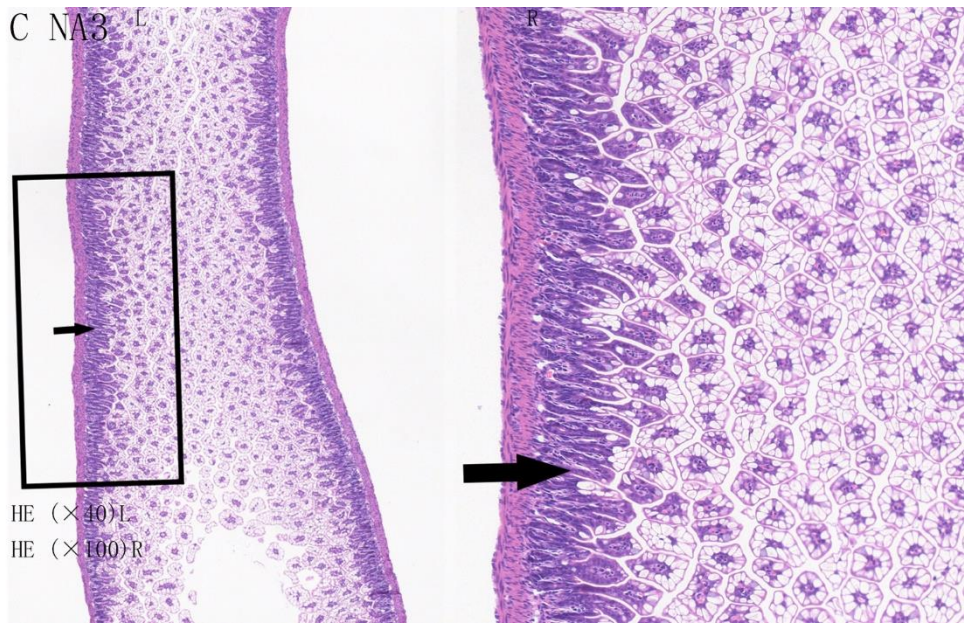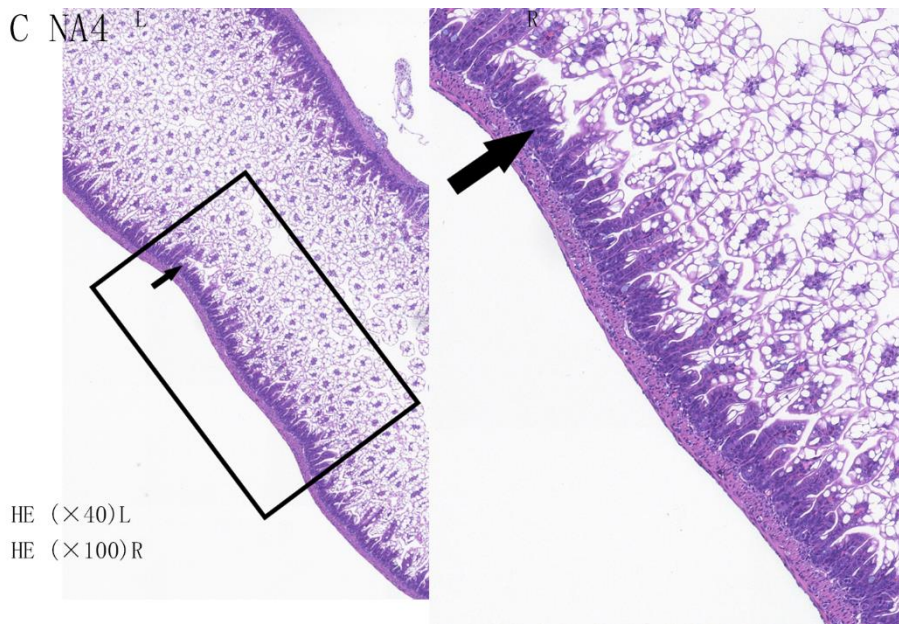

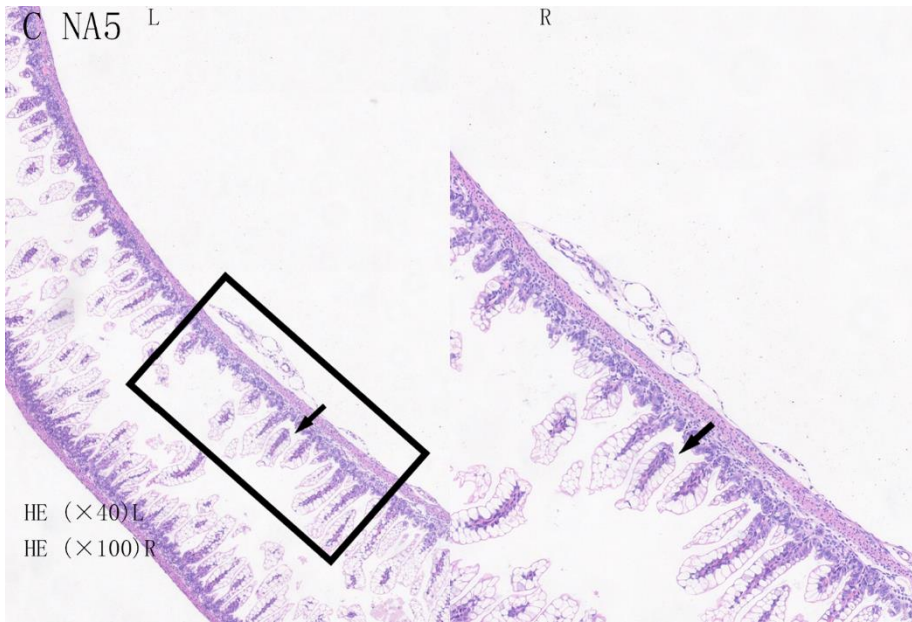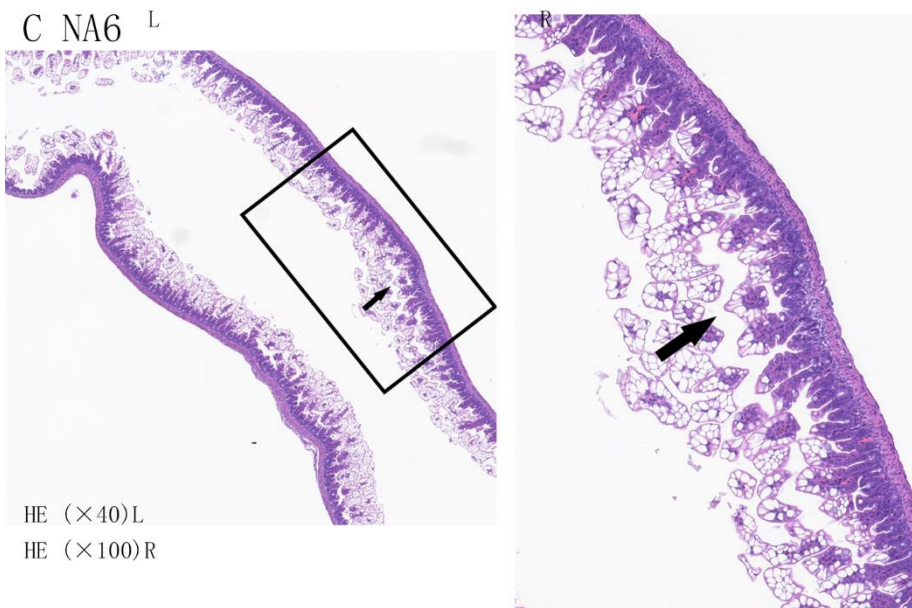

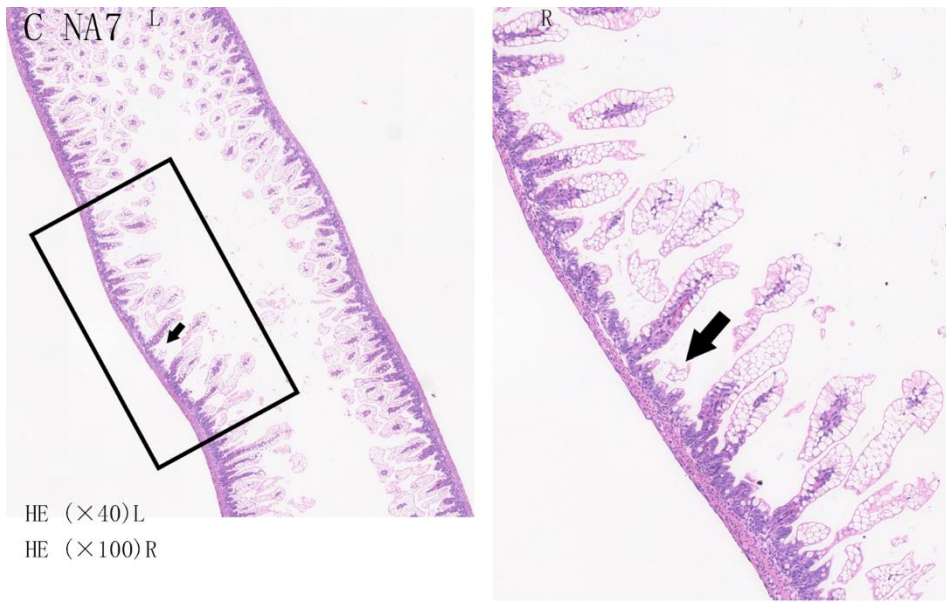

**Supplementary Figure 1.** (A-C) Light microscopy images of HE staining. Histological damage in the terminal ilea of each sample from the three groups: control group (A, Con1–7), NEC group (B, NEC1–7), NA group (C, NA1–7). Black rectangle indicates a representative area, with a zoomed-in image. Black arrow indicates the damage area. Magnification: ×40 (L-left) and ×100 (R-right). Scale bars: 250  $\mu$ m (L) and 100  $\mu$ m (R).
