# Supplementary material for: Exogenous Autoinducer-2 Rescues Intestinal Dysbiosis and Intestinal Inflammation in a Neonatal Mouse Necrotizing Enterocolitis Model
Source: PubMed Central journal article supplement (PMC8375469; doi:10.3389/fcimb.2021.694395), 2021-08-05
Supplement: Image_2.pdf [file Image_2.pdf]

## Supplementary Material

### 1.1 Supplementary Figures

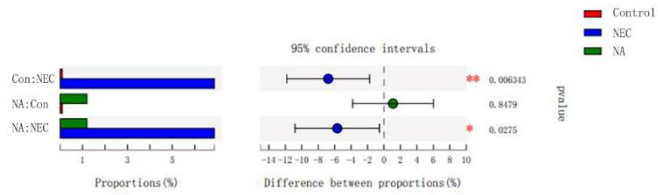

**Supplementary Figure 2.** Average relative abundances of *Clostridium\_sensu\_stricto\_1* at the species level among the three groups. Numbers of samples: Con (n=12), NEC (n=10), and NA (n=11). Statistics: Kruskal-Wallis test with Scheffe's post-hoc test.
