# Supplementary material for: Exogenous Autoinducer-2 Rescues Intestinal Dysbiosis and Intestinal Inflammation in a Neonatal Mouse Necrotizing Enterocolitis Model
Source: PubMed Central journal article supplement (PMC8375469; doi:10.3389/fcimb.2021.694395), 2021-08-05
Supplement: Image_3.pdf [file Image_3.pdf]

## Supplementary Material

### 1.1 Supplementary Figures

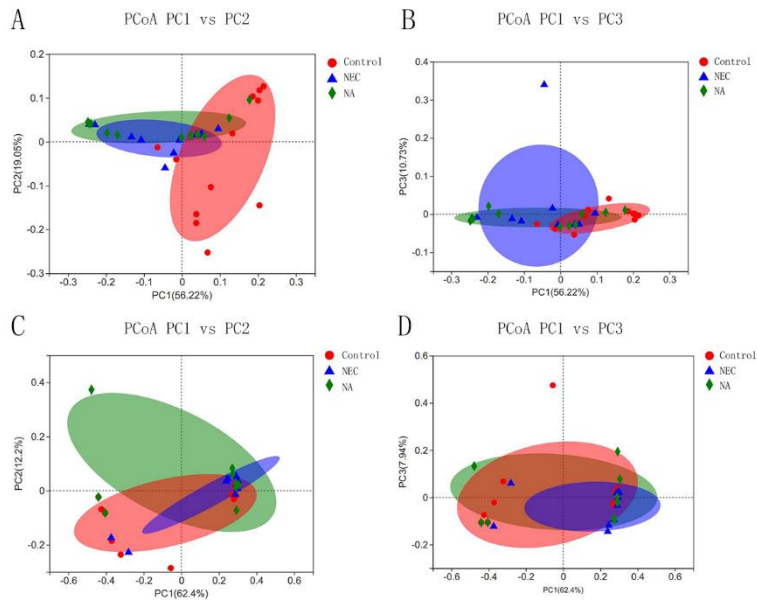

**Supplementary Figure 3.** PCoA based on weighted and unweighted UniFrac distances. (A and B) PCoA results based on the weighted UniFrac distance. (C and D) PCoA results based on the unweighted UniFrac distance. PC- percent variance explained.
