# Supplementary material for: Exogenous Autoinducer-2 Rescues Intestinal Dysbiosis and Intestinal Inflammation in a Neonatal Mouse Necrotizing Enterocolitis Model
Source: PubMed Central journal article supplement (PMC8375469; doi:10.3389/fcimb.2021.694395), 2021-08-05
Supplement: Image_4.pdf [file Image_4.pdf]

## *Supplementary Material*

### 1.1 Supplementary Figures

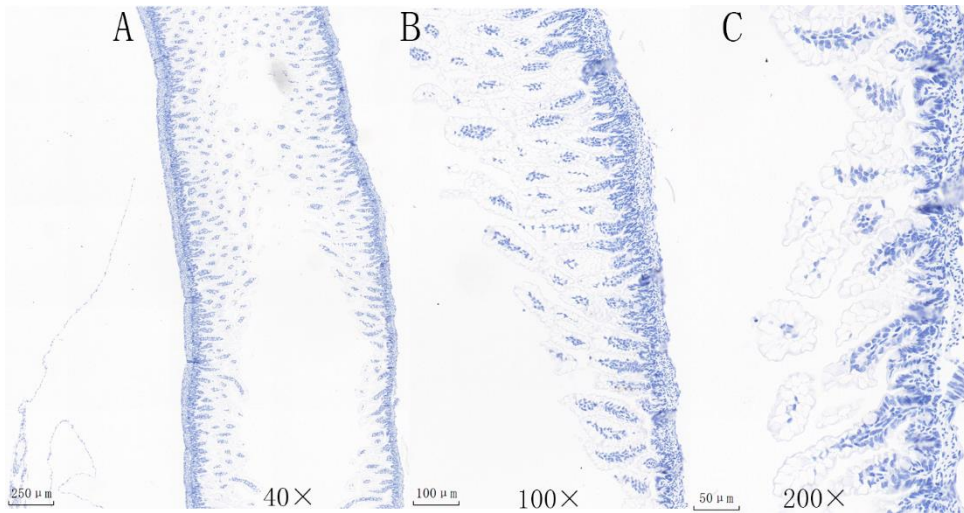

**Supplementary Figure 4.** Images of immunohistochemical staining (secondary antibody and DAB control alone). (A) Magnification:  $\times 40$ . Scale bar =  $250\ \mu\text{m}$ . (B) Magnification:  $\times 100$ . Scale bar =  $100\ \mu\text{m}$ . (C) Magnification:  $\times 200$ . Scale bar =  $50\ \mu\text{m}$ .
